# Supplementary material for: Tunable room temperature magnetoelectric response of SmFeO3/poly(vinylidene fluoride) nanocomposite films
Source: Royal Society of Chemistry journal article supplement (doi:10.1039/c6ra01152g), 2016-01-01
Supplement: c6ra01152g1.pdf [file c6ra01152g1.pdf]

## Supplementary Information

**Tunable room temperature magnetoelectric response of SmFeO<sub>3</sub>/poly (vinylidene fluoride) nanocomposite films**

*Anju Ahlawat,<sup>1\*</sup> Srinibas Satapathy,<sup>1\*</sup> Ram J. Choudhary,<sup>2</sup> Mandar M. Shirolkar,<sup>3</sup> Mrigendra K. Singh<sup>1</sup> and Pradeep K. Gupta<sup>1</sup>*

<sup>1</sup>Nano-Functional Materials Laboratory, Laser Materials Development & Devices Division, Raja Ramanna Centre for Advanced Technology, Indore 452013, India

<sup>2</sup>UGC-DAE Consortium for Scientific Research, Indore 452017, India

<sup>3</sup>Hefei National Laboratory for Physical Sciences at the Microscale, University of Science and Technology of China, Hefei, Anhui 230026, People's Republic of China

Email: [anju@rrcat.gov.in](mailto:anju@rrcat.gov.in); [srinu73@rrcat.gov.in](mailto:srinu73@rrcat.gov.in)

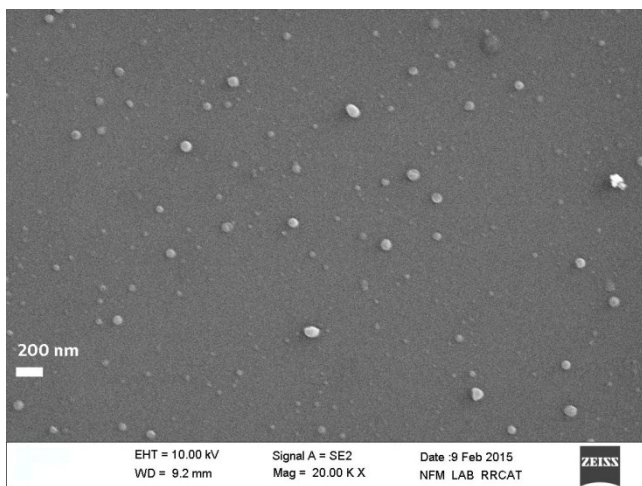

**Figure S1.** SEM image of  $\text{SmFeO}_3$  nanoparticles.

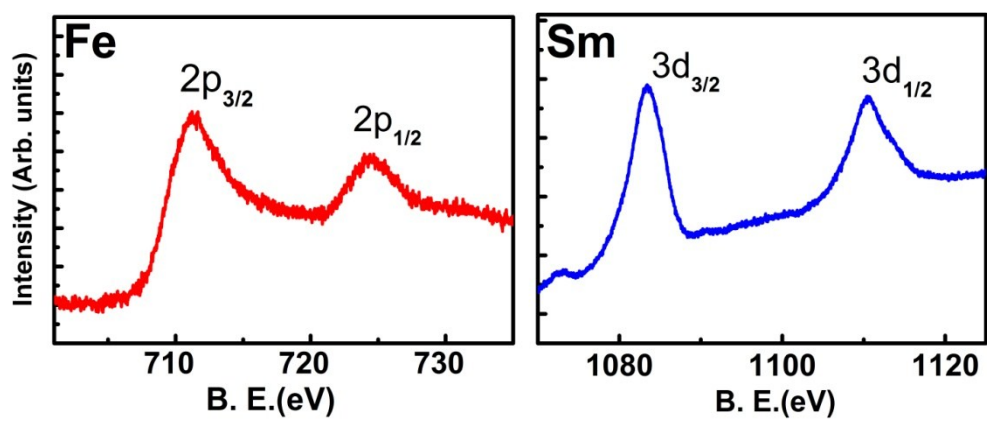

**Figure S2.** Fe - 2p and Sm - 3d core level spectra of  $\text{SmFeO}_3$  nanoparticles.
